# Supplementary material for: Synthesis of Mesoporous Silica Adsorbent Modified with Mercapto–Amine Groups for Selective Adsorption of Cu2+ Ion from Aqueous Solution
Source: MDPI journal article supplement (doi:10.3390/nano12183232), 2022-09-18
Supplement: s1 [file s1]

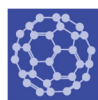

Supplementary Materials

# Synthesis of Mesoporous Silica Adsorbent Modified with Mercapto–Amine Groups for Selective Adsorption of $\text{Cu}^{2+}$ Ion from Aqueous Solution

Sagar M. Mane <sup>1</sup>, Chaitany Jayprakash Raorane <sup>2,\*</sup> and Jae Cheol Shin <sup>1,\*</sup><sup>1</sup> Division of Electronics and Electrical Engineering, Dongguk University-Seoul, Seoul 04620, Korea<sup>2</sup> School of Chemical Engineering, Yeungnam University, Gyeongsan 38541, Korea

\* Correspondence: chaitanyaraorane22@gmail.com (C.J.R.); jcshin@dgu.ac.kr (J.C.S.)

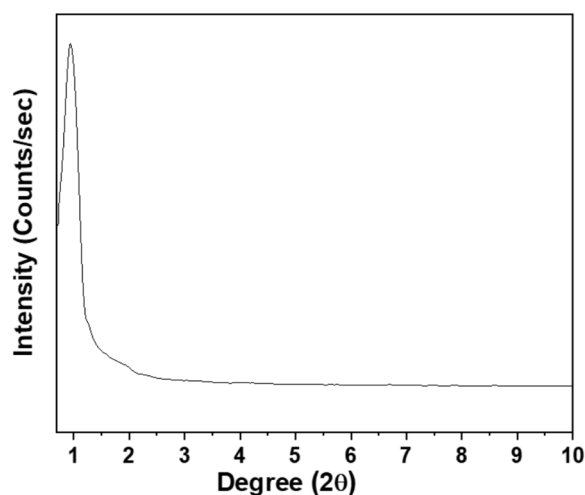

Figure S1. XRD analysis of control MSNs sample.

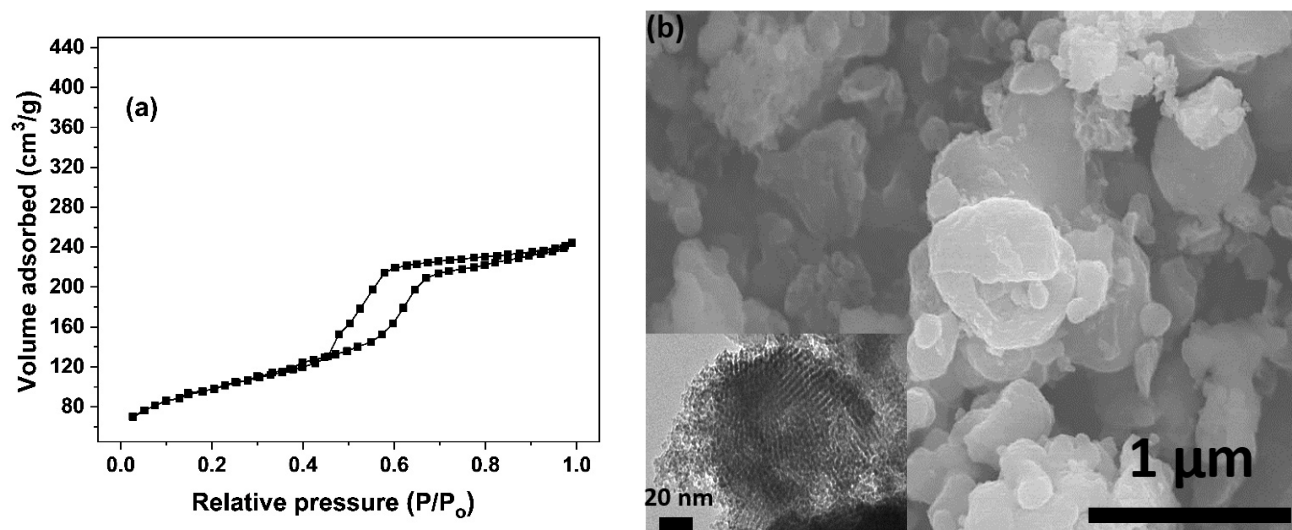Figure S2. (a)  $\text{N}_2$  sorption analysis; and (b) SEM and TEM (inset) images of control MSNs sample.

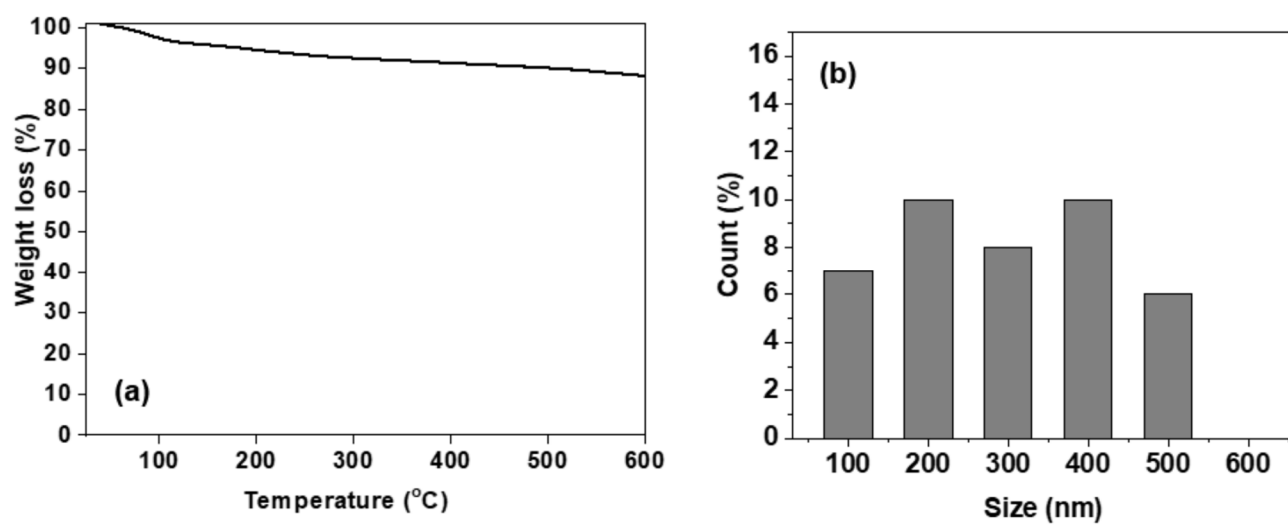

Figure S3. (a) TGA; and (b) DLS analysis of control MSNs sample.
